# Supplementary material
Source: MDPI journal article supplement (https://www.mdpi.com/2073-4409/7/11/216)
Supplement: s2 [file s2]

Archive with 1 entries (1 files):
- cells-388781-SI.pdf
