# Supplementary material for: Synthesis and Biological Evaluation of Novel Triple-Modified Colchicine Derivatives as Potent Tubulin-Targeting Anticancer Agents
Source: MDPI journal article supplement (doi:10.3390/cells7110216), 2018-11-19
Supplement: s2 [file s2 › cells-388781-SI.pdf]

# Synthesis and biological evaluation of novel triple-modified Colchicine derivatives as potent tubulin-targeting anticancer agents

Urszula Majcher<sup>1</sup>, Greta Klejborowska<sup>1</sup>, Magdalena Kaik<sup>1</sup>, Ewa Maj<sup>2</sup>, Joanna Wietrzyk<sup>2</sup>, Mahshad Moshari<sup>3</sup>, Jordane Preto<sup>4</sup>, Jack A. Tuszyński<sup>4,5</sup> and Adam Huczyński<sup>1,\*</sup>

<sup>1</sup> Department of Bioorganic Chemistry, Faculty of Chemistry, Adam Mickiewicz University, Umultowska 89b, 61-614 Poznań, Poland.

<sup>2</sup> Hirszfeld Institute of Immunology and Experimental Therapy, Polish Academy of Sciences, Rudolfa Weigla 12, 53-114 Wrocław, Poland.

<sup>3</sup> Department of Chemistry, University of Alberta, Edmonton, Alberta T6G 1Z2, Canada.

<sup>4</sup> Department of Oncology, University of Alberta, Edmonton, Alberta T6G 1Z2, Canada.

<sup>5</sup> DIMEAS, Politecnico di Torino, Corso Duca degli Abruzzi 24, Turin, Italy.

\* Correspondence: adhucz@amu.edu.pl; Tel.: +48-61-829-1673

## Supplementary Materials

**Figure S1.** The <sup>13</sup>C NMR spectrum of **2** in CDCl<sub>3</sub>.

**Figure S2.** The <sup>1</sup>H NMR spectrum of **2** in CDCl<sub>3</sub>.

**Figure S3.** The <sup>13</sup>C NMR spectrum of **3** in CDCl<sub>3</sub>.

**Figure S4.** The <sup>1</sup>H NMR spectrum of **3** in CDCl<sub>3</sub>.

**Figure S5.** The <sup>13</sup>C NMR spectrum of **4** in CDCl<sub>3</sub>.

**Figure S6.** The <sup>1</sup>H NMR spectrum of **4** in CDCl<sub>3</sub>.

**Figure S7.** The <sup>13</sup>C NMR spectrum of **5** in CDCl<sub>3</sub>.

**Figure S8.** The <sup>1</sup>H NMR spectrum of **5** in CDCl<sub>3</sub>.

**Figure S9.** The <sup>13</sup>C NMR spectrum of **6** in CDCl<sub>3</sub>.

**Figure S10.** The <sup>1</sup>H NMR spectrum of **6** in CDCl<sub>3</sub>.

**Figure S11.** The <sup>13</sup>C NMR spectrum of **7** in CDCl<sub>3</sub>.

**Figure S12.** The <sup>1</sup>H NMR spectrum of **7** in CDCl<sub>3</sub>.

**Figure S13.** The <sup>13</sup>C NMR spectrum of **8** in CDCl<sub>3</sub>.

**Figure S14.** The <sup>1</sup>H NMR spectrum of **8** in CDCl<sub>3</sub>.

**Figure S15.** The <sup>19</sup>F NMR spectrum of **8** in CDCl<sub>3</sub>.

**Figure S16.** The <sup>13</sup>C NMR spectrum of **9** in CDCl<sub>3</sub>.

**Figure S17.** The <sup>1</sup>H NMR spectrum of **9** in CDCl<sub>3</sub>.

**Figure S18.** The <sup>13</sup>C NMR spectrum of **10** in CDCl<sub>3</sub>.

**Figure S19.** The <sup>1</sup>H NMR spectrum of **10** in CDCl<sub>3</sub>.

**Figure S20.** The <sup>13</sup>C NMR spectrum of **11** in CDCl<sub>3</sub>.

**Figure S21.** The <sup>1</sup>H NMR spectrum of **11** in CDCl<sub>3</sub>.

**Figure S22.** The <sup>13</sup>C NMR spectrum of **12** in CDCl<sub>3</sub>.

**Figure S23.** The <sup>1</sup>H NMR spectrum of **12** in CDCl<sub>3</sub>.

**Figure S24.** 3D plots of the linear regression results for the binding energies (BE) vs MlogP vs log IC<sub>50</sub> [μM] values for LoVo cell line.

**Figure S25.** 3D plots of the linear regression results for the binding energies (BE) vs MlogP vs log IC<sub>50</sub> [μM] values for LoVo/DX cell line.

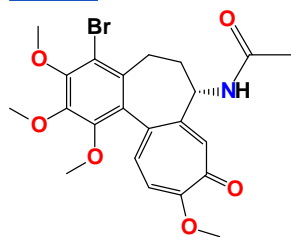

Chemical formula:  $C_{22}H_{24}BrNO_6$ , MW = 478.3 g/mol

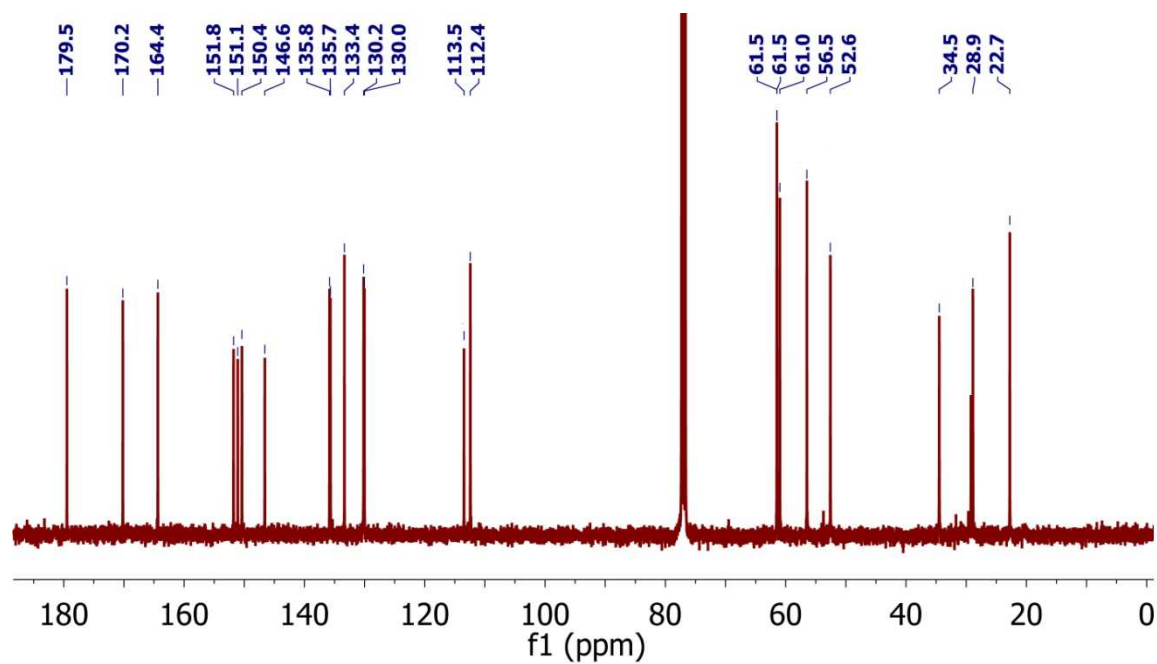

Figure S1. The  $^{13}C$  NMR spectrum of **2** in  $CDCl_3$ .

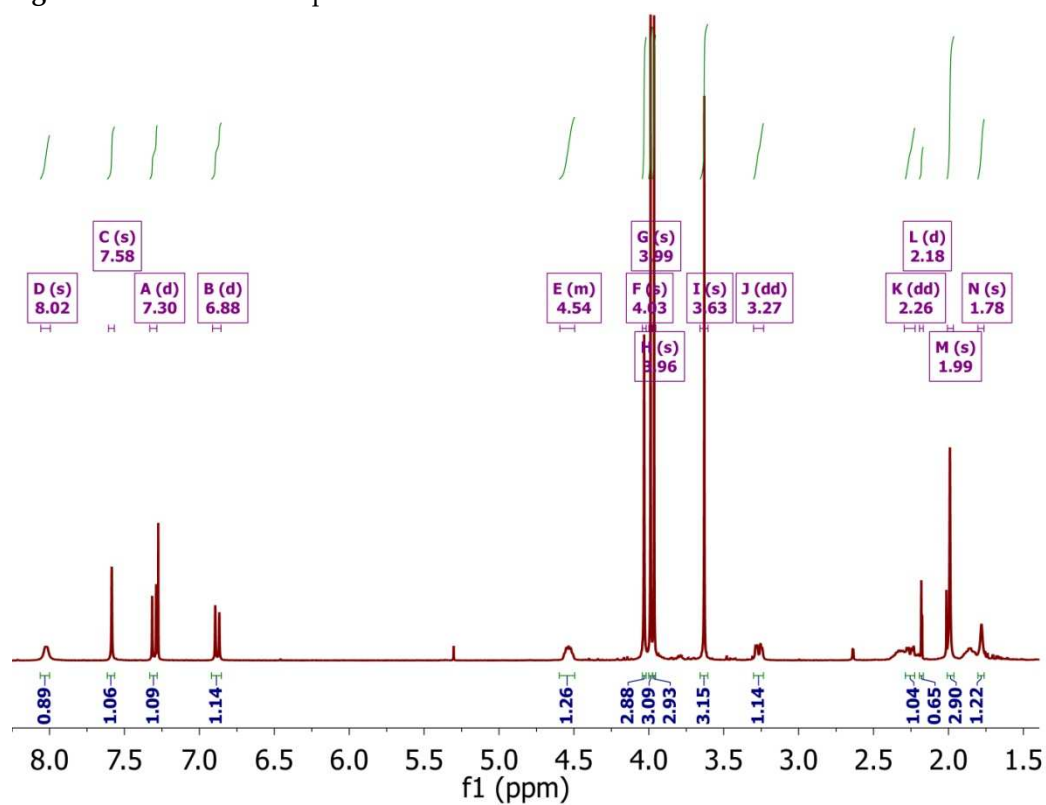

Figure S2. The  $^1H$  NMR spectrum of **2** in  $CDCl_3$ .

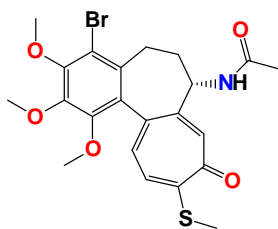

Chemical formula:  $C_{22}H_{24}BrNO_5S$ , MW = 494.4 g/mol

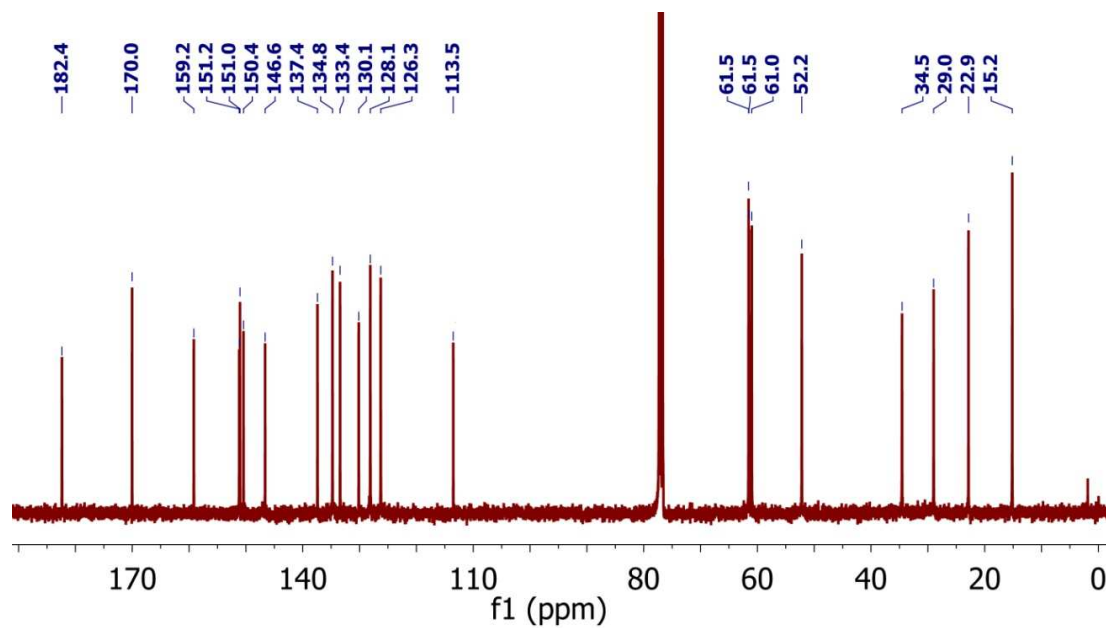

Figure S3. The  $^{13}C$  NMR spectrum of **3** in  $CDCl_3$ .

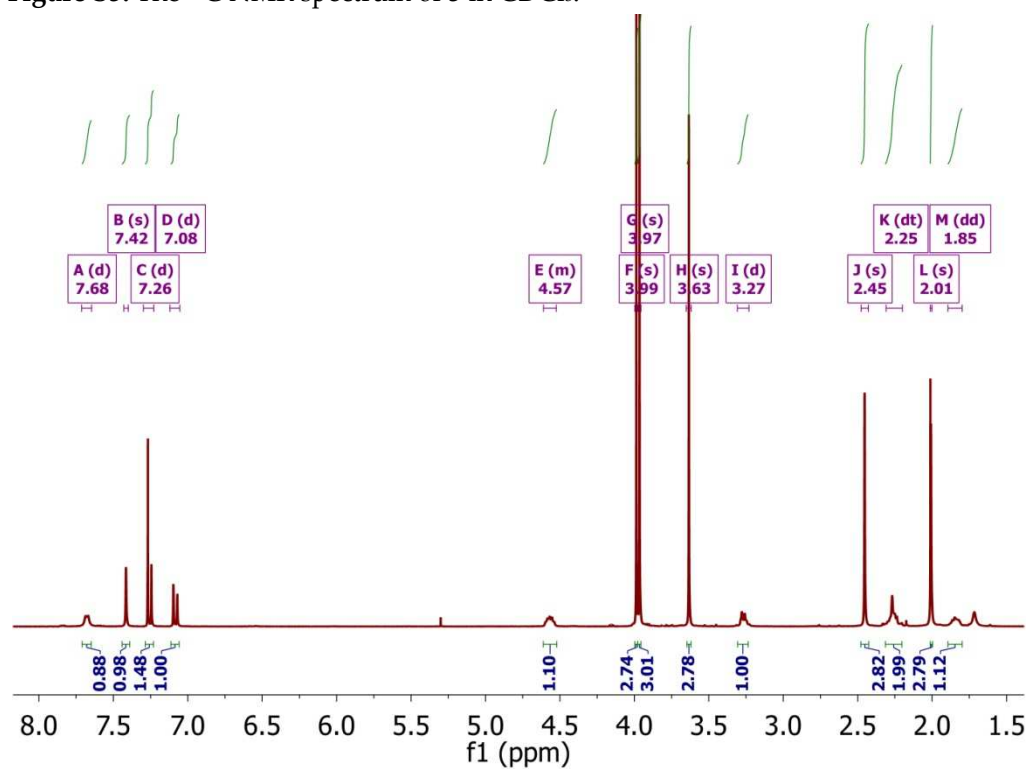

Figure S4. The  $^1H$  NMR spectrum of **3** in  $CDCl_3$ .

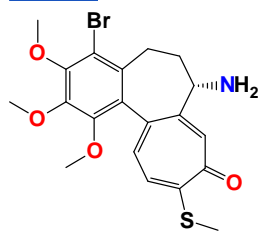

Chemical formula:  $C_{20}H_{22}BrNO_4S$ , MW = 452.4 g/mol

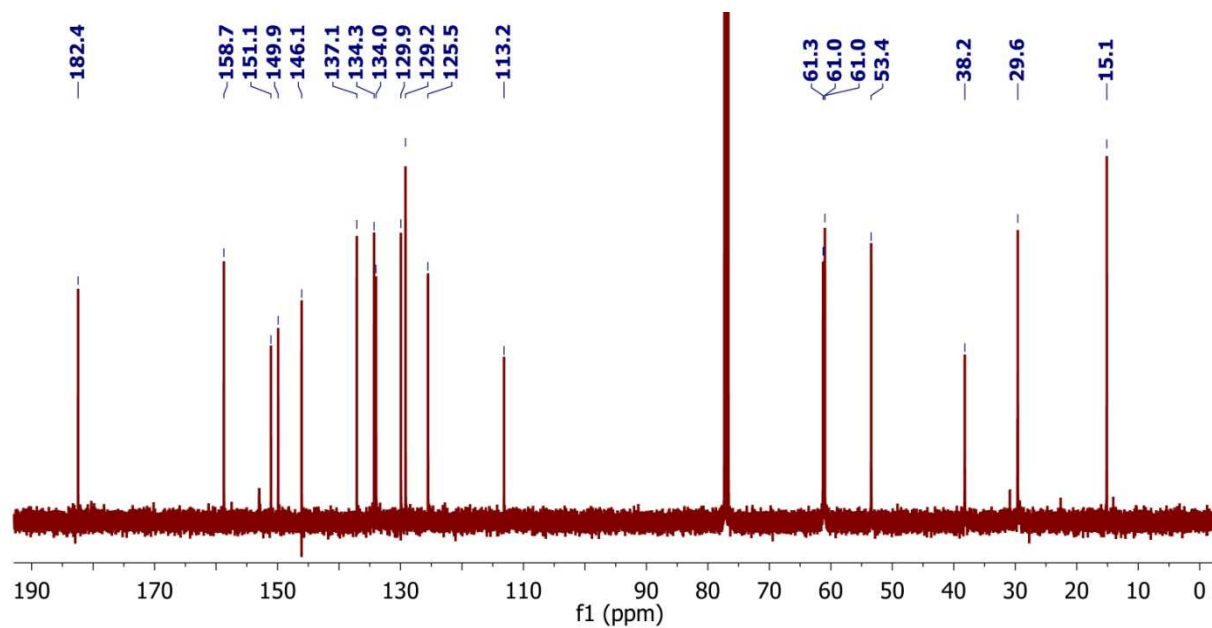

Figure S5. The  $^{13}C$  NMR spectrum of 4 in  $CDCl_3$ .

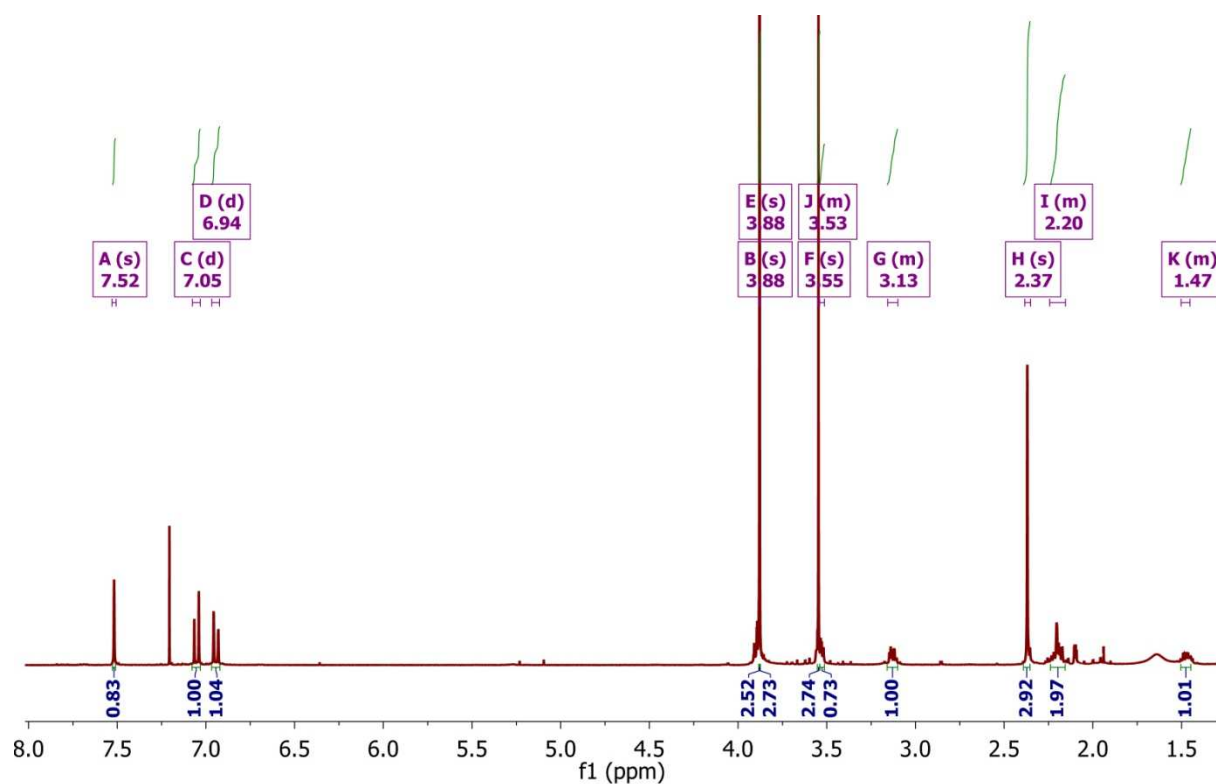

Figure S6. The  $^1H$  NMR spectrum of 4 in  $CDCl_3$ .

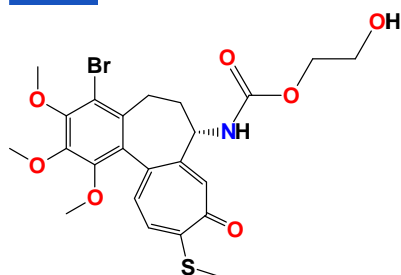

Chemical formula:  $C_{23}H_{26}BrNO_7S$ , MW = 539.1 g/mol

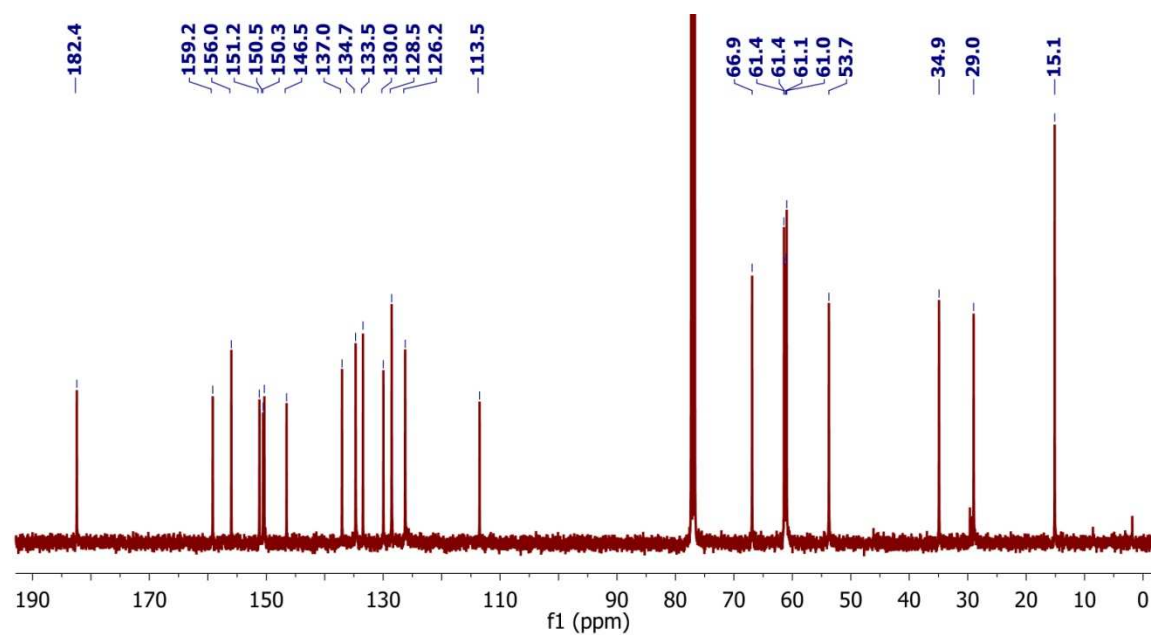

Figure S7. The  $^{13}C$  NMR spectrum of **5** in  $CDCl_3$ .

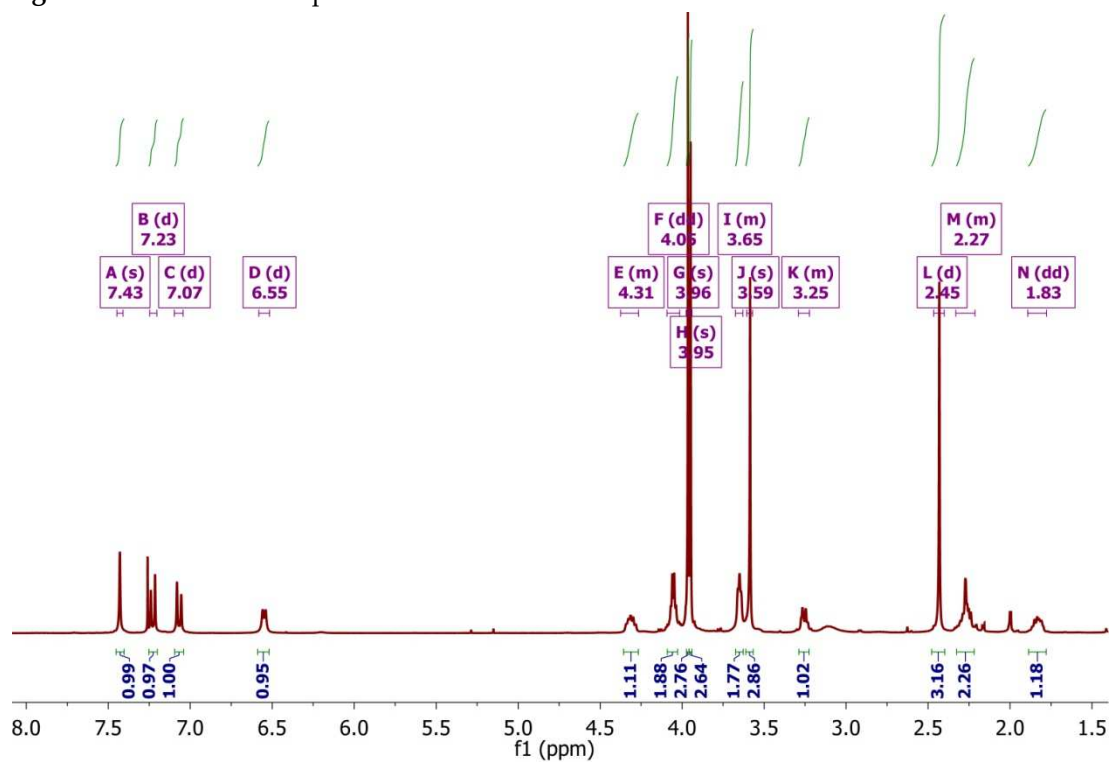

Figure S8. The  $^1H$  NMR spectrum of **5** in  $CDCl_3$ .

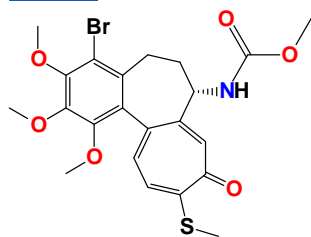

Chemical formula:  $C_{22}H_{24}BrNO_6S$ , MW = 509.1 g/mol

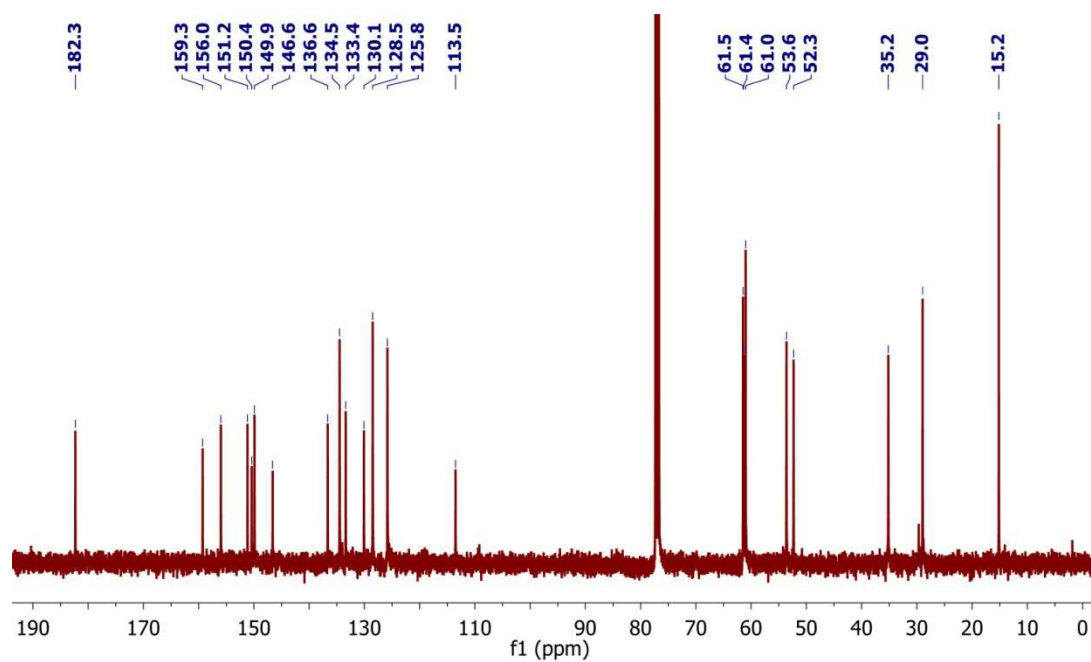

Figure S9. The  $^{13}C$  NMR spectrum of **6** in  $CDCl_3$ .

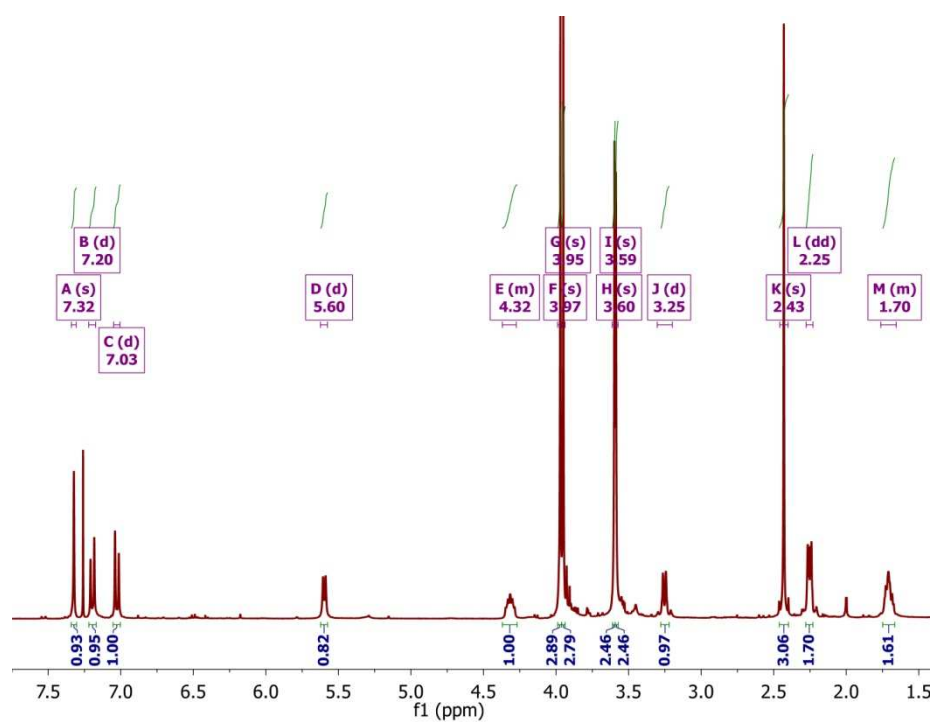

Figure S10. The  $^1H$  NMR spectrum of **6** in  $CDCl_3$ .

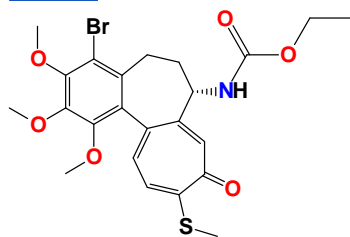

Chemical formula:  $C_{23}H_{26}BrNO_6S$ , MW = 524.4 g/mol

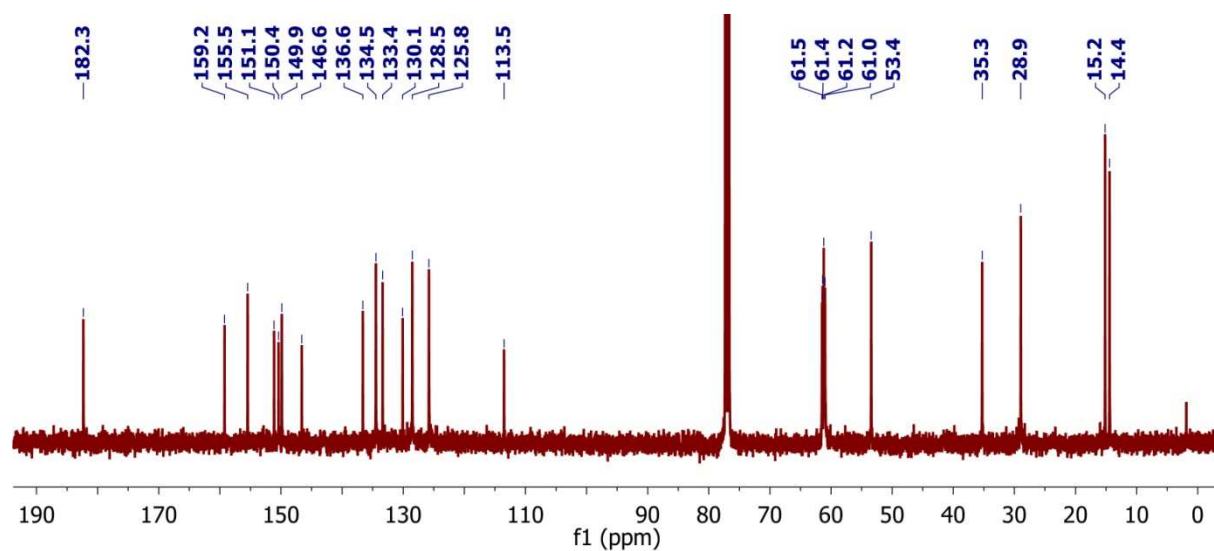

**Figure S11.** The  $^{13}C$  NMR spectrum of **7** in  $CDCl_3$ .

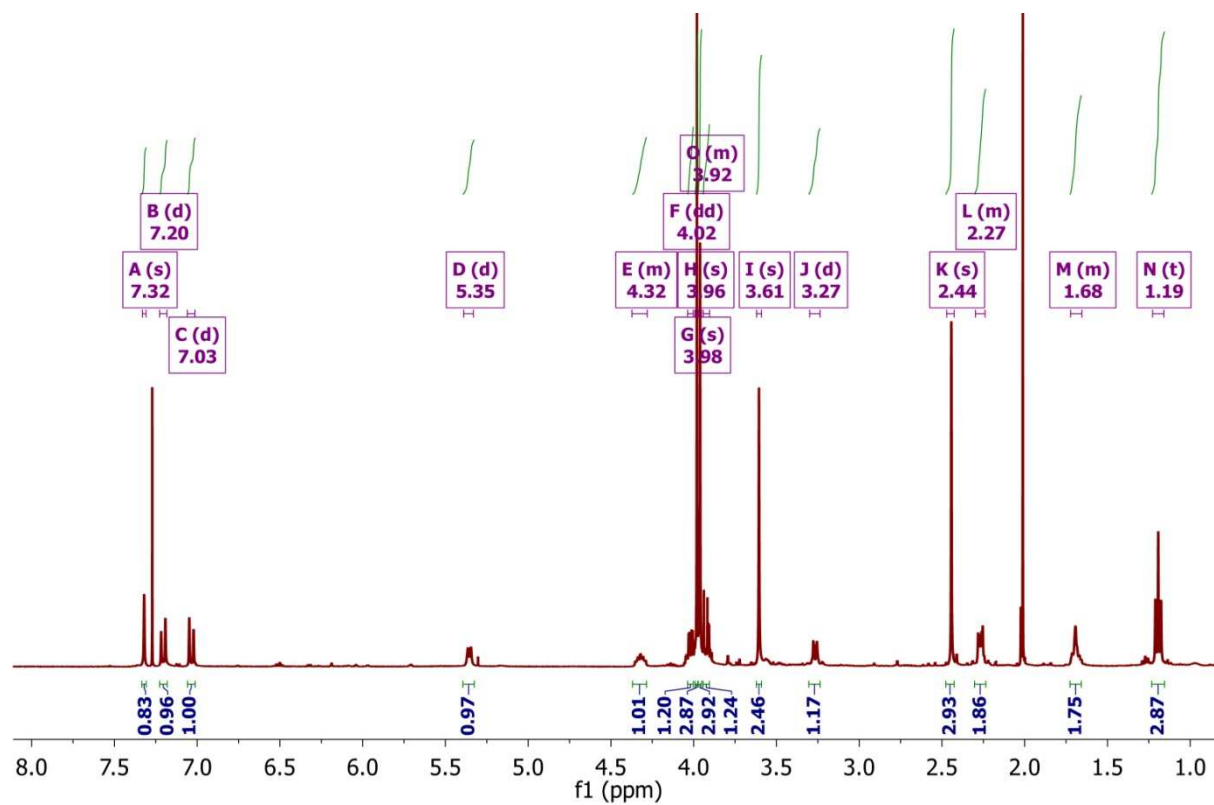

**Figure S12.** The  $^1H$  NMR spectrum of **7** in  $CDCl_3$ .

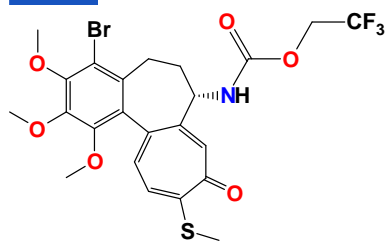

Chemical formula:  $C_{23}H_{23}BrF_3NO_6S$ , MW = 578.4 g/mol

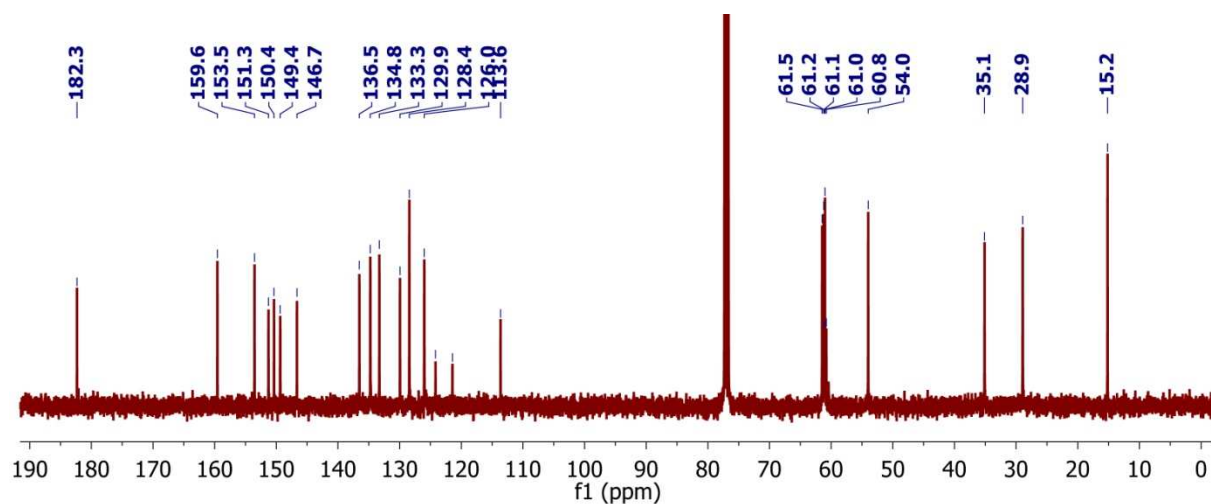

**Figure S13.** The  $^{13}C$  NMR spectrum of **8** in  $CDCl_3$ .

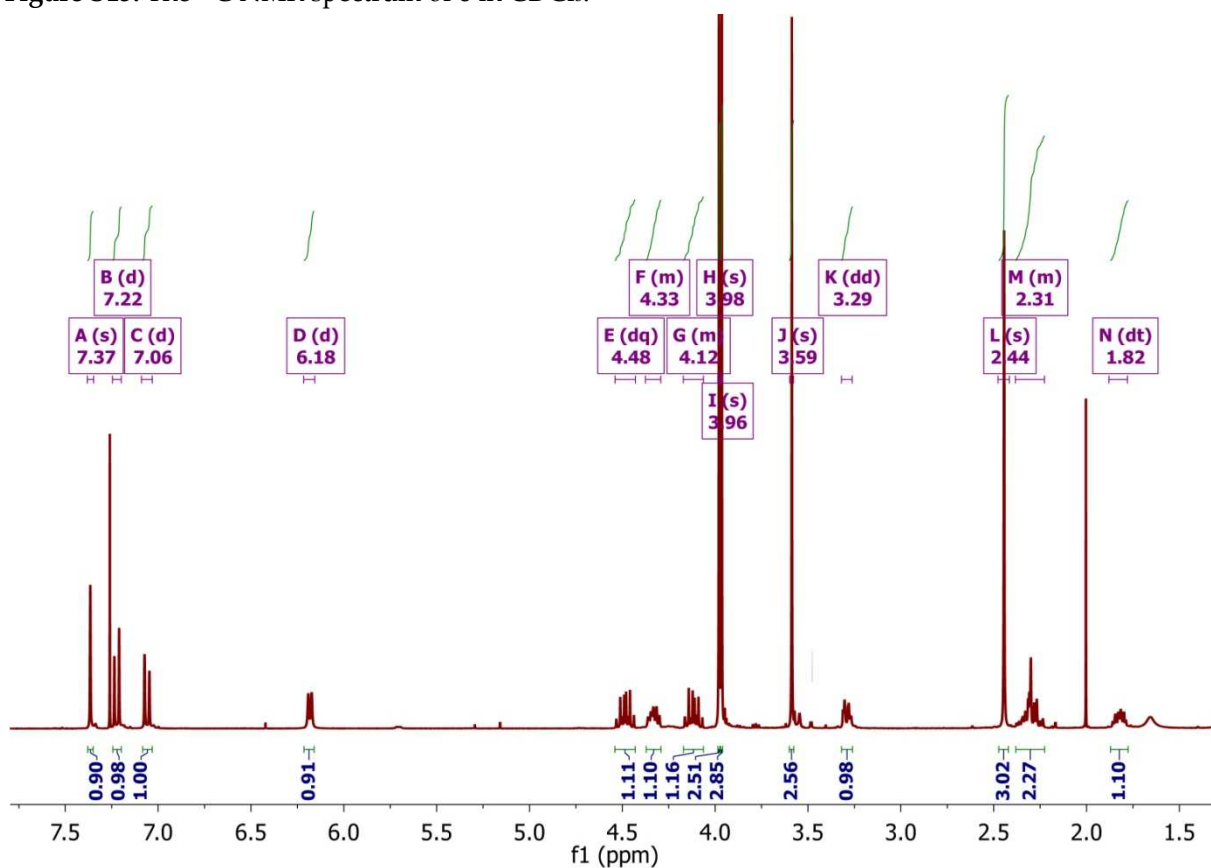

**Figure S14.** The  $^1H$  NMR spectrum of **8** in  $CDCl_3$ .

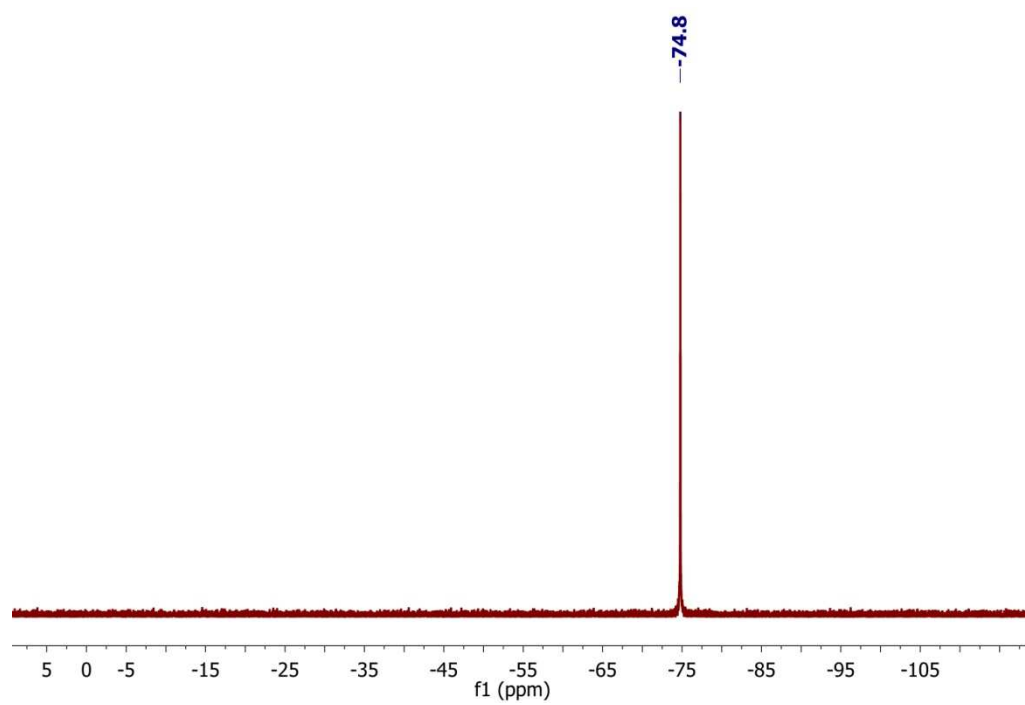

**Figure S15.** The  $^{19}\text{F}$  NMR spectrum of **8** in  $\text{CDCl}_3$ .

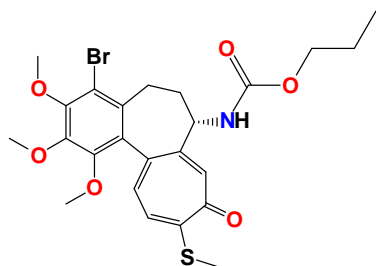

Chemical formula:  $C_{24}H_{28}BrNO_6S$ , MW = 538.5 g/mol

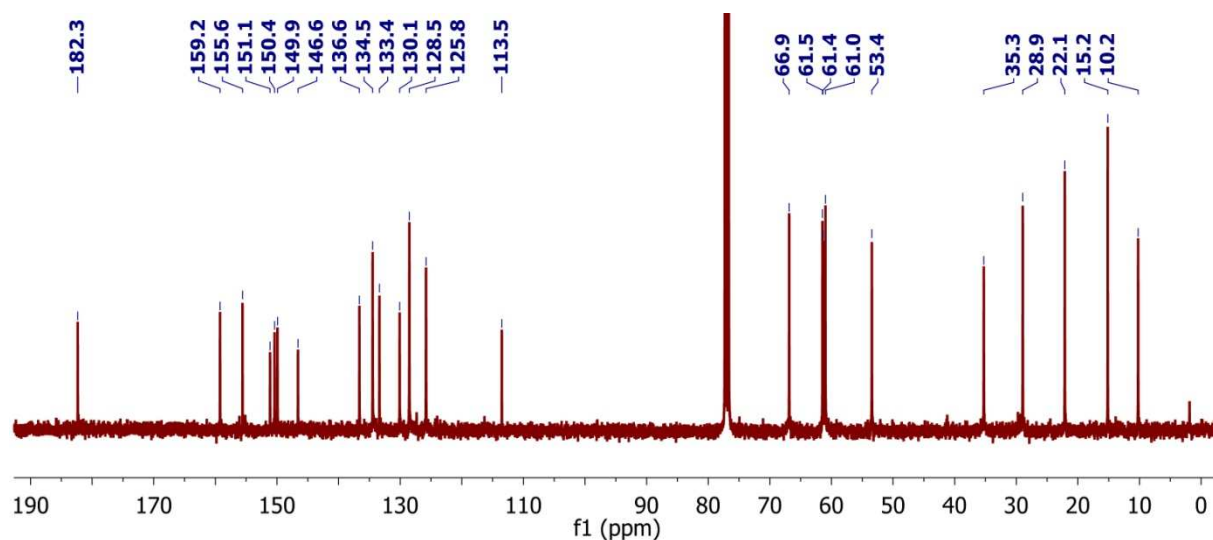

Figure S16. The  $^{13}C$  NMR spectrum of **9** in  $CDCl_3$ .

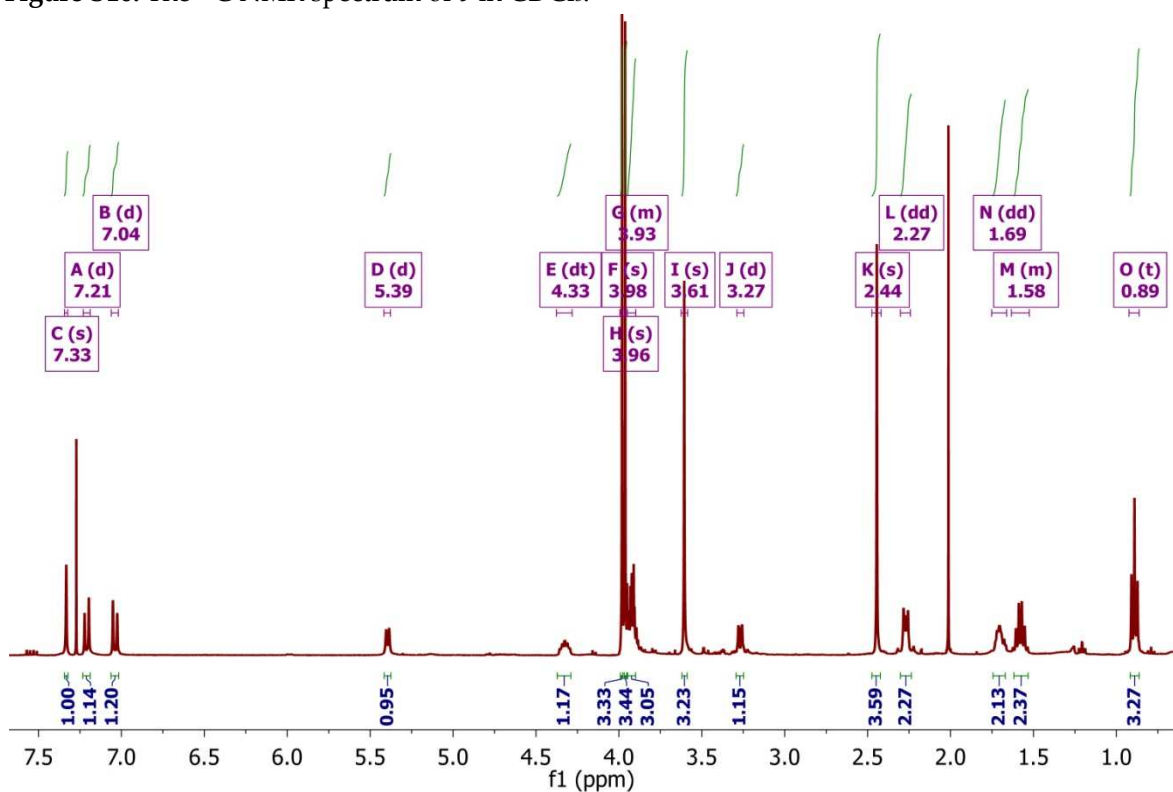

Figure S17. The  $^1H$  NMR spectrum of **9** in  $CDCl_3$ .

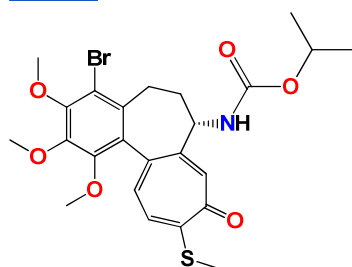

Chemical formula:  $C_{24}H_{28}BrNO_6S$ , MW = 538.5 g/mol

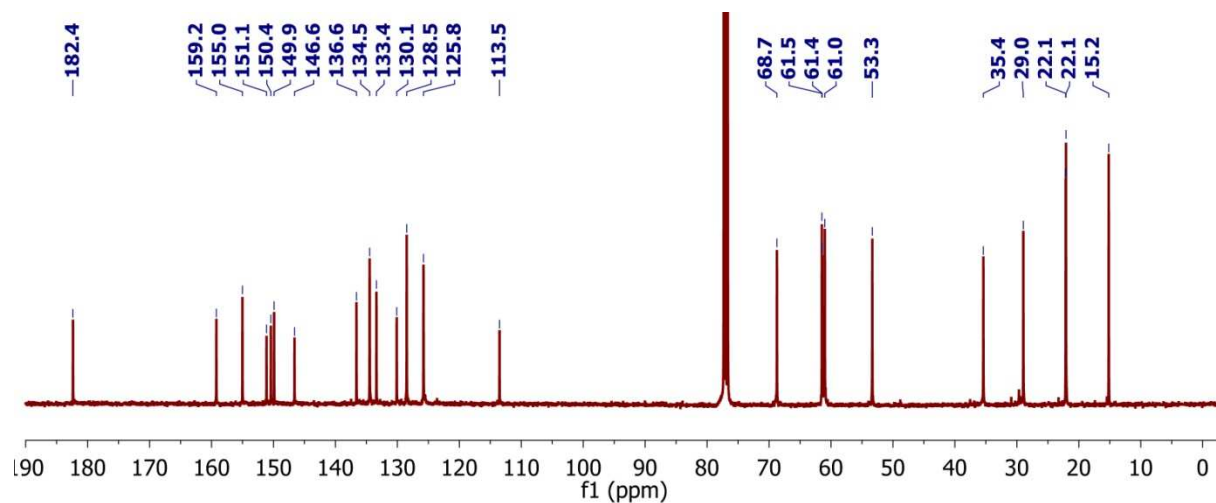

Figure S18. The  $^{13}C$  NMR spectrum of **10** in  $CDCl_3$ .

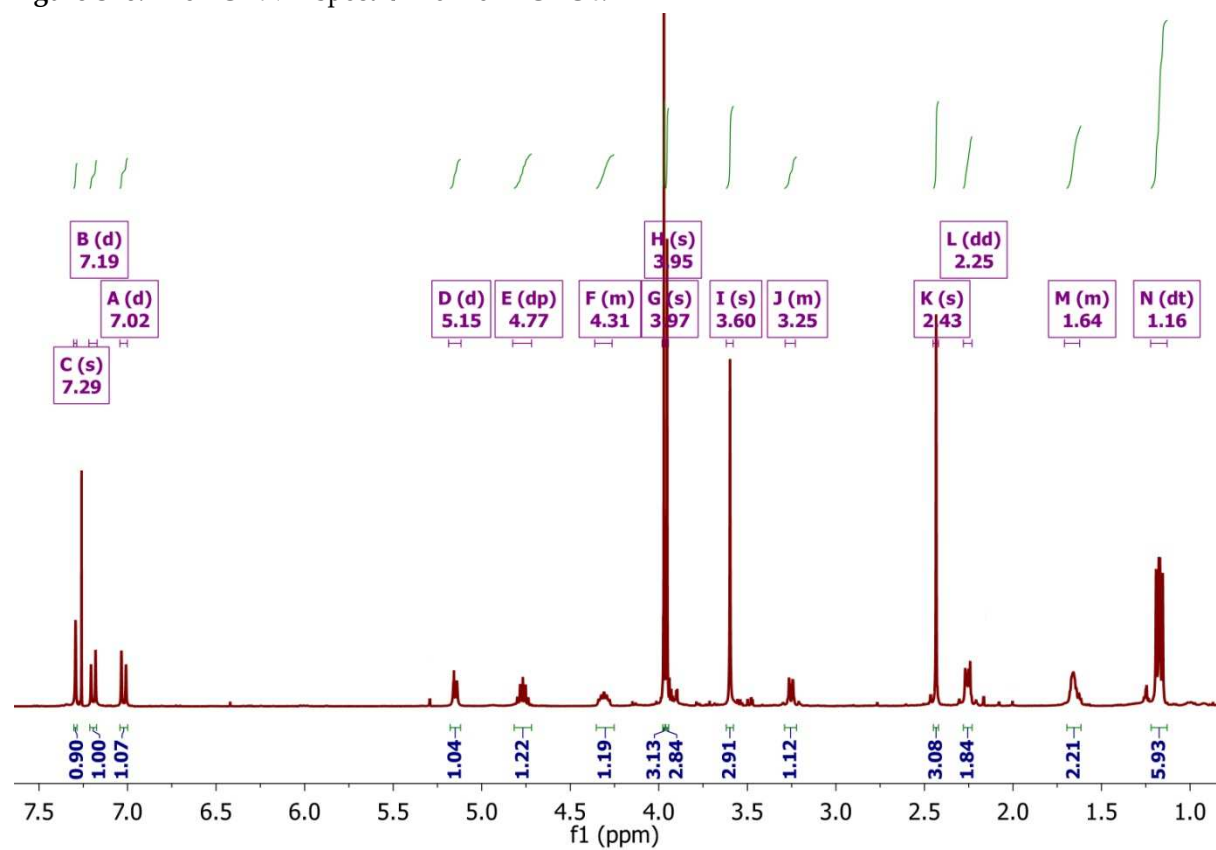

**Figure S19.** The  $^1\text{H}$  NMR spectrum of **10** in  $\text{CDCl}_3$ .

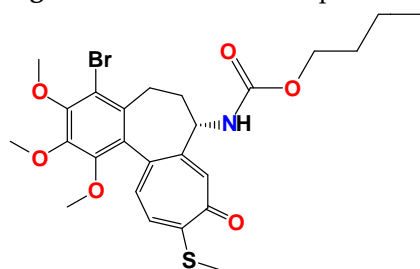

Chemical formula:  $\text{C}_{25}\text{H}_{30}\text{BrNO}_6\text{S}$ , MW = 551.1 g/mol

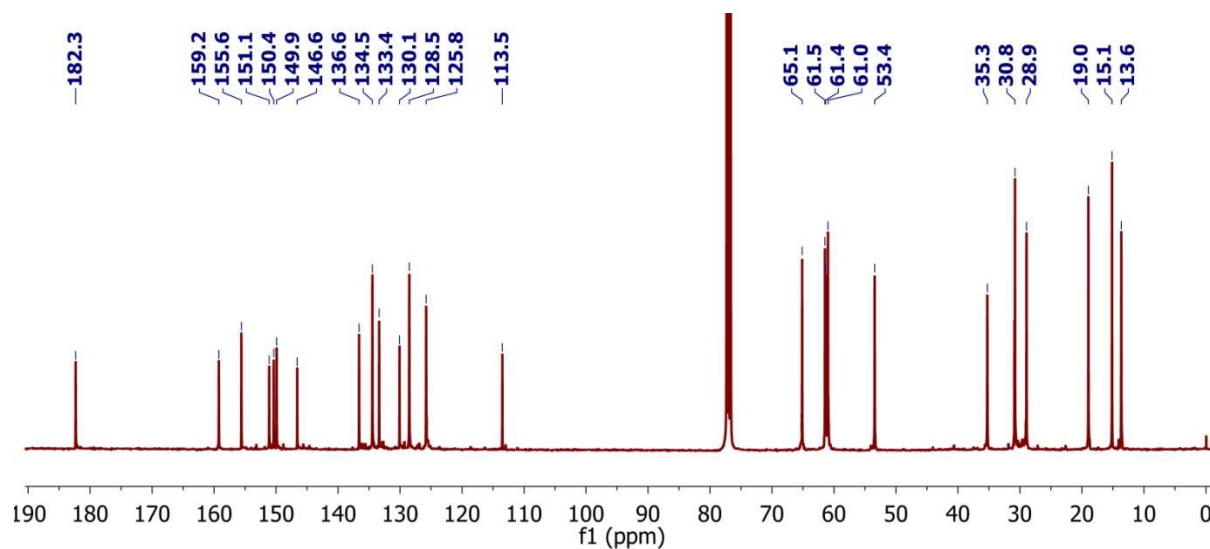

**Figure S20.** The  $^{13}\text{C}$  NMR spectrum of **11** in  $\text{CDCl}_3$ .

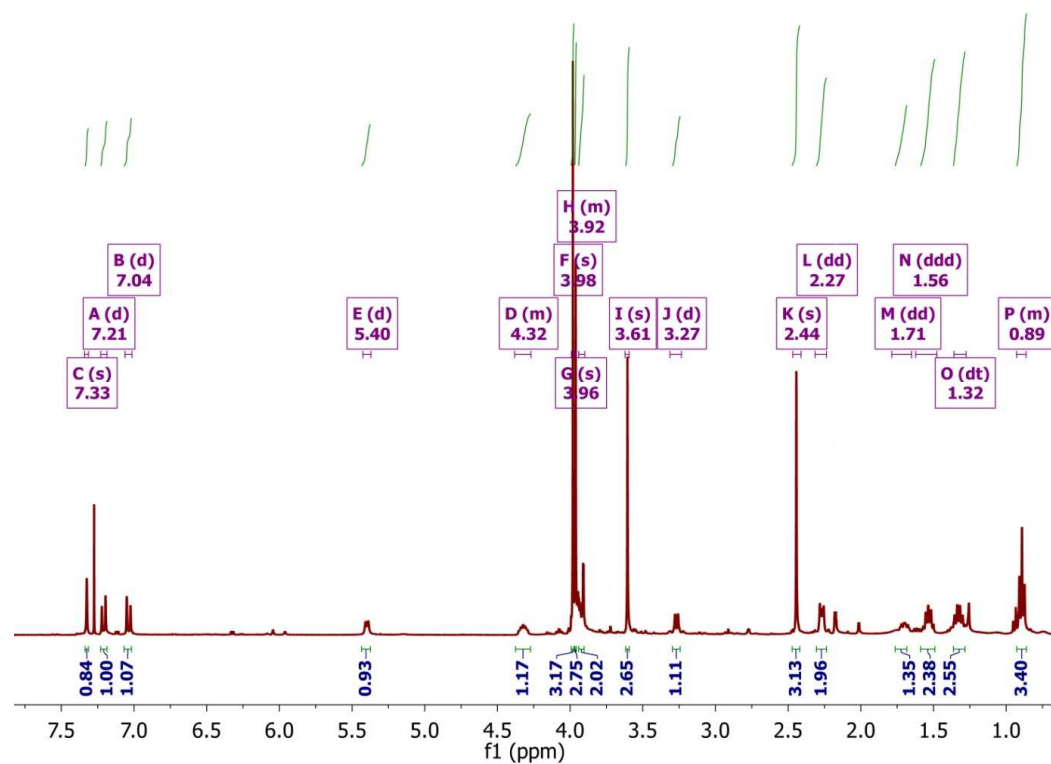

**Figure S21.** The  $^1\text{H}$  NMR spectrum of **11** in  $\text{CDCl}_3$ .

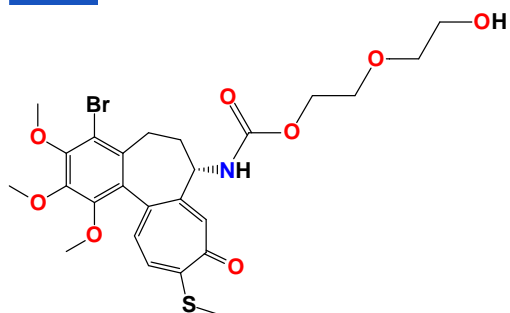

Chemical formula:  $C_{25}H_{30}BrNO_8S$ , MW = 584.5 g/mol

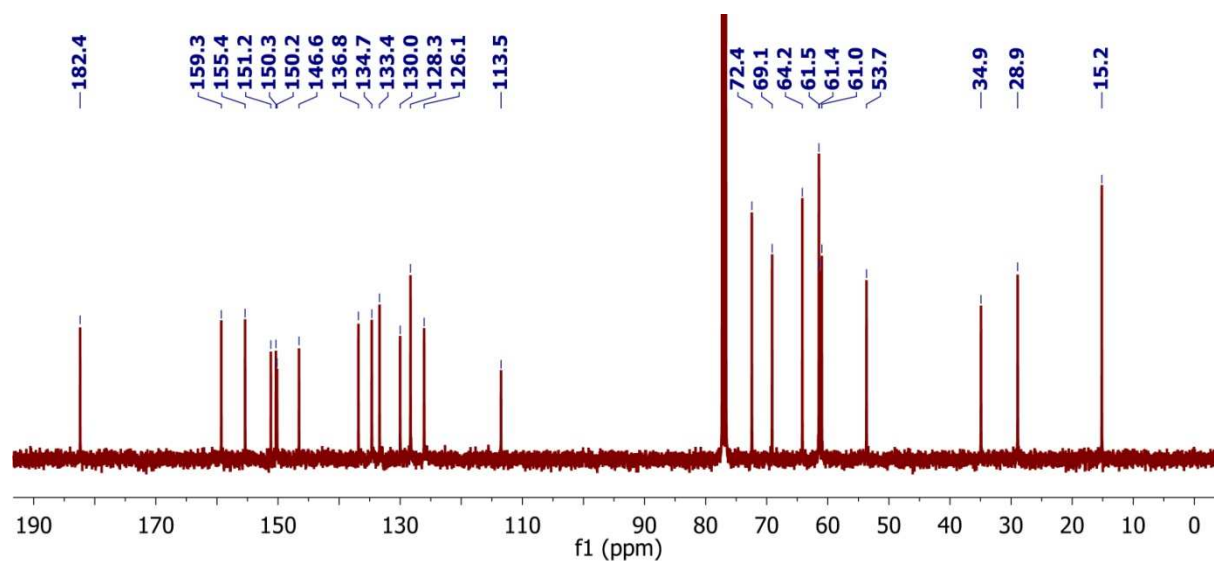

Figure S22. The  $^{13}C$  NMR spectrum of **12** in  $CDCl_3$ .

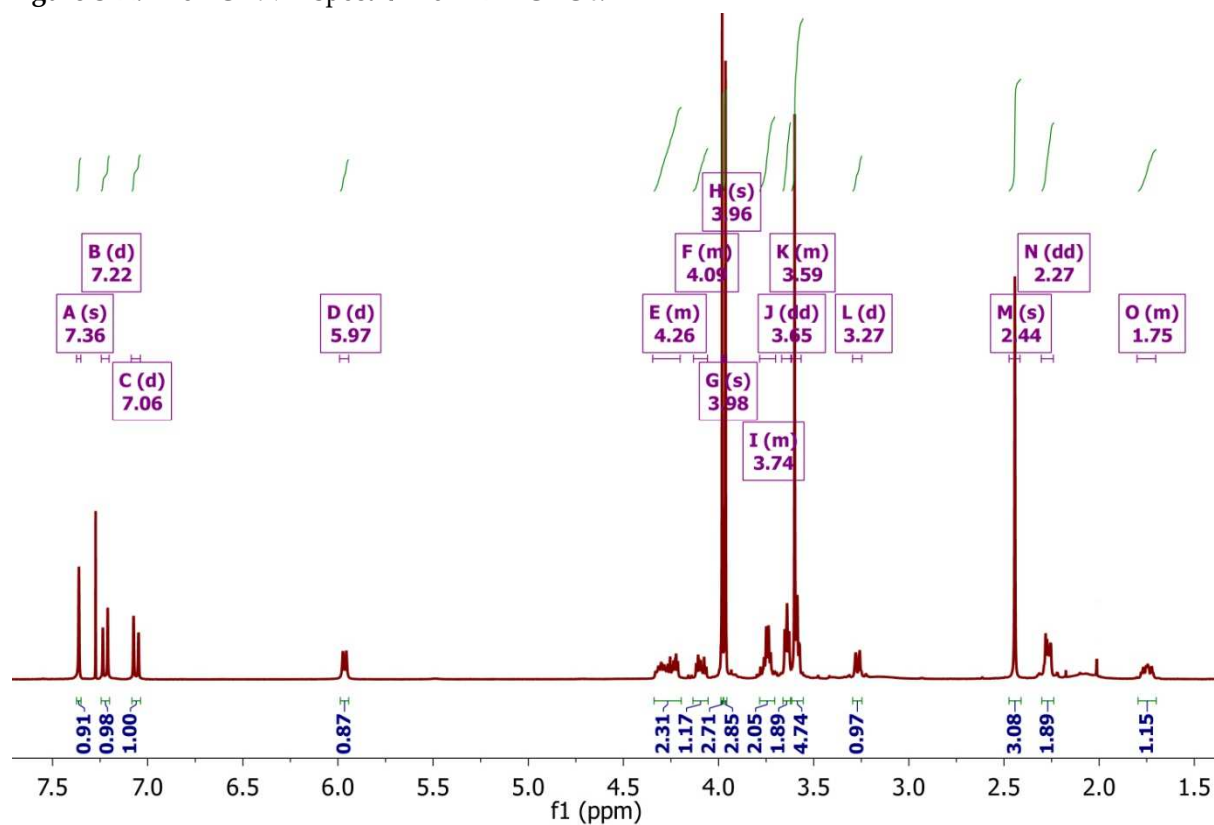

Figure S23. The  $^1H$  NMR spectrum of **12** in  $CDCl_3$ .

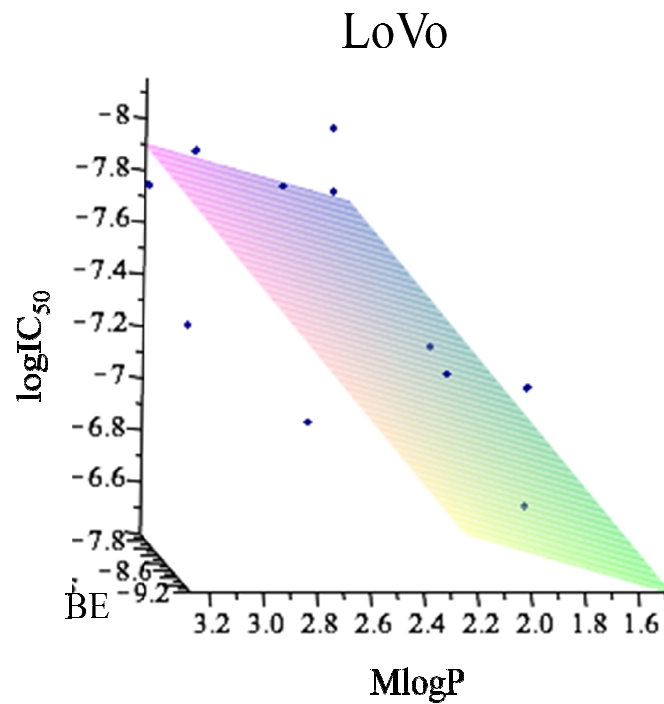

**Figure S24.** 3D plots of the linear regression results for the binding energies (BE) vs MlogP vs log IC<sub>50</sub> [μM] values for LoVo cell line.

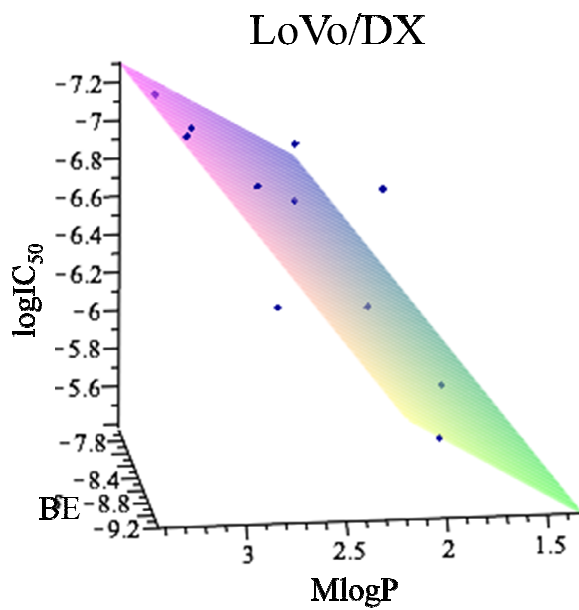

**Figure S25.** 3D plots of the linear regression results for the binding energies (BE) vs MlogP vs log IC<sub>50</sub> [μM] values for LoVo/DX cell line.
